# Supplementary material for: Effect of Chitin Nanocrystal Deacetylation on a Nature-Mimicking Interface in Carbon Fiber Composites
Source: MDPI journal article supplement (doi:10.3390/jcs8050163), 2024-04-26
Supplement: s1 [file s1]

## Supporting informations

# Effect of Chitin Nanocrystal Deacetylation on a Nature-Mimicking Interface in Carbon Fiber Composites

Abdellatif M. Abdel-Mohsen <sup>1</sup>, Rasha M. Abdel-Rahman <sup>1</sup>, Lukáš Kalina <sup>2</sup>, Vishakha Vishakha <sup>3</sup>,  
Ludmila Kaprálková <sup>1</sup>, Pavel Němeček <sup>1</sup>, Josef Jančář <sup>2,3</sup> and Ivan Kelnar <sup>1,\*</sup>

<sup>1</sup> Institute of Macromolecular Chemistry, Czech Academy of Sciences, Heyrovského nám. 2, 162 00 Praha, Czech Republic

<sup>2</sup> Materials Research Center, Faculty of Chemistry, Brno University of Technology, Purkyňova 464/118, 612 00 Brno, Czech Republic

<sup>3</sup> CEITEC-Central European Institute of Technology, Brno University of Technology, Purkyňova 656/123, 612 00 Brno, Czech Republic

\* Correspondence: kelnar@imc.cas.cz

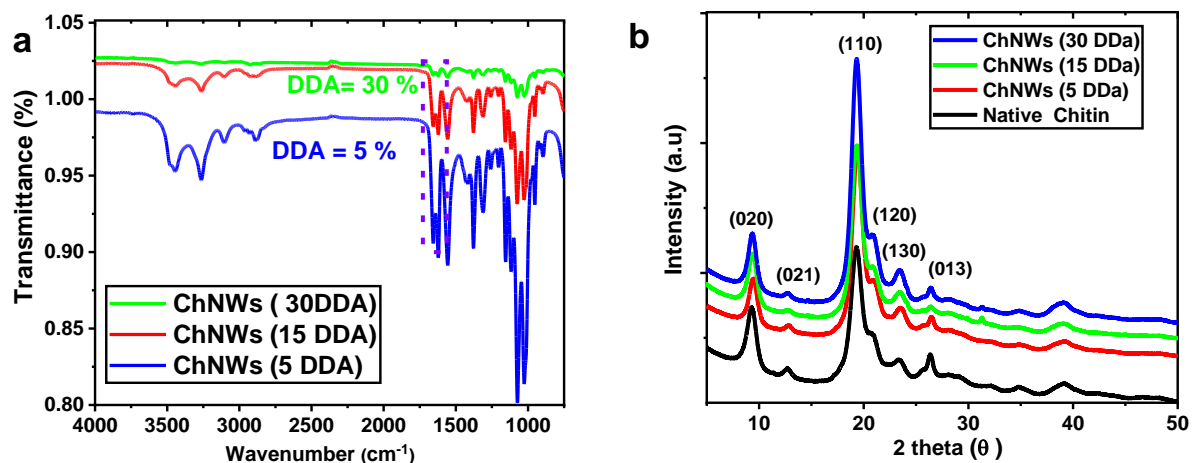

**Figure S1.** (a) FTIR and (b) XRD of ChNCs with different degree of deacetylation

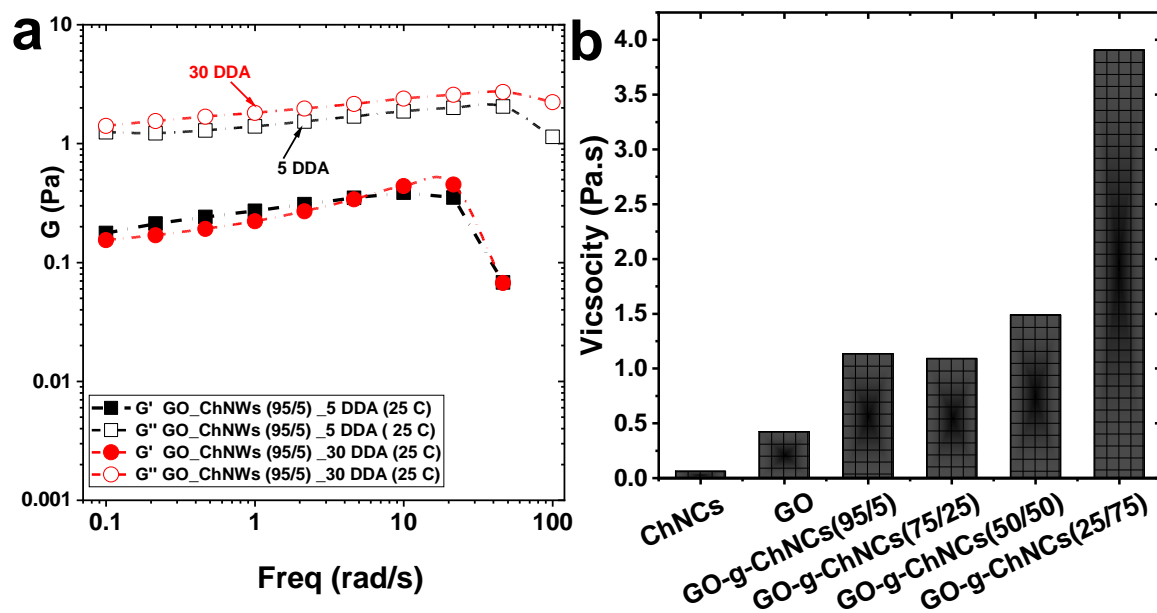

**Figure S2.** Rheological characterization of water suspensions (5mg/ml) of single components and adducts

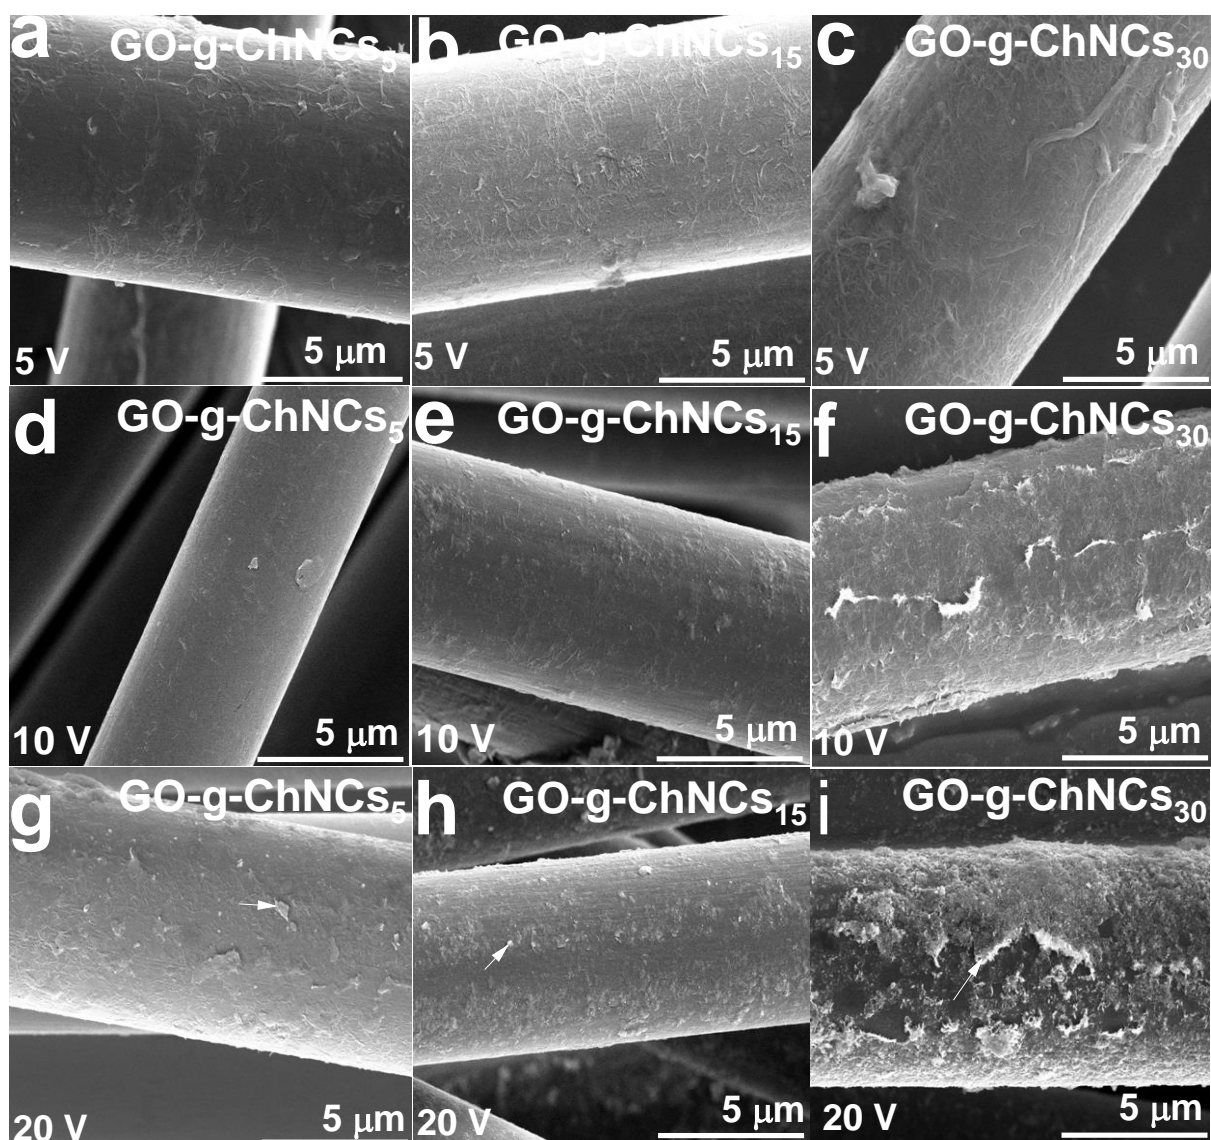

**Figure S3.** Effects of voltage and DDA percentages on OCF coating efficiency Conditions: 10 min; 5 mg; pH 3.5, rt.

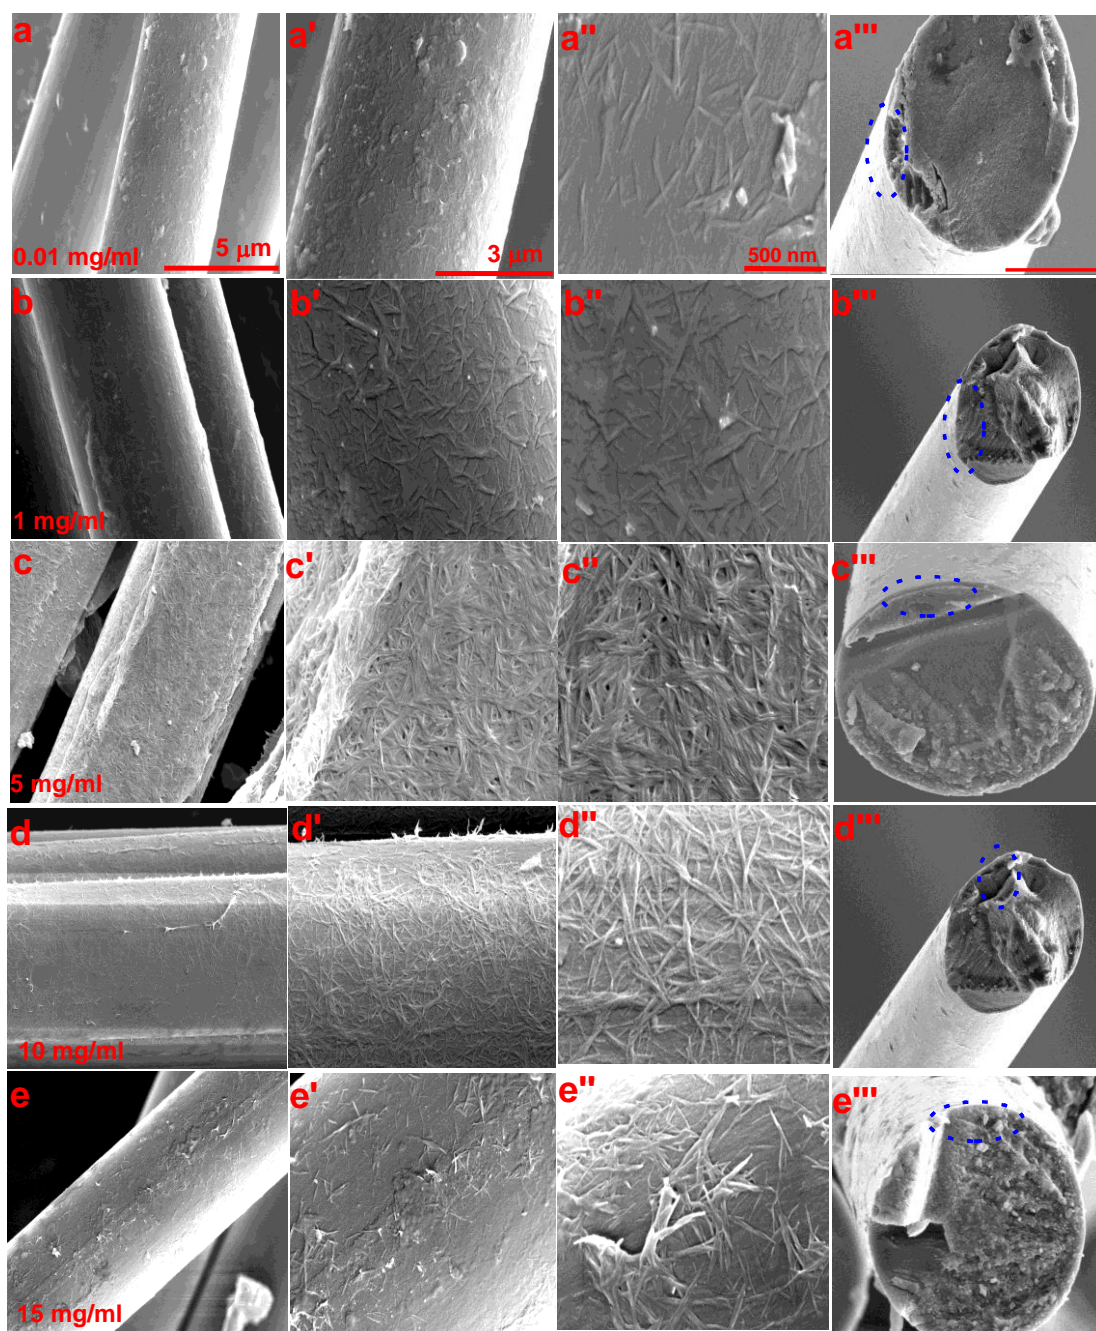

**Figure S4.** Effect of concentration of GO/ChNCs<sub>30</sub> adduct suspension on OCF coating structure  
 Conditions: 10 min, 5 V, DDA 30 %, pH 3.5, different concentration of GO-g-ChNCs (0.01 to 15 mg/ml), rt.
